# Supplementary material
Source: publisher site journal article supplement (https://www.dovepress.com/article/463657)
Supplement: Supplementary file 1 [file get_supplementary_file.php]

*Supplementary material*

1. Methods

*Encapsulation efficiency and drug loading determination*

The nanoparticle dispersion was mixed with acetonitrile (1:8, *v*/*v*) ,followed by sonication for 15 min. After filtration with 0.22 μm filter membrane, the concentration of silibinin in the filtrate was determined using HPLC. The encapsulation efficiency (EE) and drug loading (DL) were obtained by the following equation 1 and 2, respectively.

|  | | (1) | |
| --- | --- | --- | --- |
|  | | (2) | |

Where W*N* indicates the amount of drug incorporated into nanoparticles, W*D* refers to the initial total weight of DL, W*T*is the total weight of nanoparticles.

*MPT assay*

HNS was prepared as the same method of HNS except silibinin was replaced with CdSe/ZnS quantum do. HNS or LPN was mixed with porcine intestinal mucus, incubated at 37 °C for 15 min, and observed under a fluorescence microscope (Olympus DP80; Olympus Optical Co. Ltd., Tokyo, Japan). The nanoparticle motion in the mucus was recorded using a cellSens Dimension system (Olympus Life Science, Waltham, MA, USA). At least 100 nanoparticles per sample were tracked (n = 3), and the ensemble-averaged MSD of the nanoparticles were calculated using Equation (1). The MSD vs t plots were analyzed using a logarithmic distribution histogram.

MSD = <[x(t + τ) – x(t)]2> + < [y(t + τ) - y(t)]2> (1)

where τ is the time scale, x and y are the corresponding particle coordinates at time t, and < > is the mean.

*Nanosight analysis*

Nanosight analysis (NTA) was performed using coumarin-6-loaded nanoparticles. LPNs or HNS (100 μL) was added to mucus (600 µL) and rapidly mixed with a pipette. The dispersion was then incubated in a 37 °C water bath. Samples were drawn after 0.5 and 1 h and rapidly diluted in accordance with determination requirements. NanoSight NS300 (Malvern Panalytical, Malvern, UK) was used to determine particle size and strength at 488 nm. Each sample was measured thrice.

*Isothermal titration calorimetry assay*

The heat flow during the binding of platycodin D to DSPE-PEG2000 was determined via isothermal titration calorimetry (ITC) assay using the MicroCal iTC 200 system (Malvern Panalytical, UK). After degassing of the solutions, DSPE-PEG2000 (3 mM) was titrated in 40 μL aliquots of platycodin D (0.05 mM) in the cell (250 μL) with an injection duration of 4 s (total number = 20). The time interval between injections was 120 s. A stirring speed of 750 rpm was set during the experiments. Data were analyzed using the MicroCal PEAQ-ITC analysis software. The thermodynamic parameters were obtained using the one-site binding model.

*In vivo Peyer’s patch absorption*

In vivo Peyer’s patch absorption was performed as follows: Sprague–Dawley rats (180–200 g) were used instead of mice. Their Peyer’s patches were collected and homogenized in radioimmunoprecipitation assay buffer and centrifuged at 10,000 × *g* and 4 °C for 3 min. Fluorescence intensity was measured using a microplate reader, and the protein content was determined using a bicinchoninic acid protein assay kit. The results are expressed as the amount of fluorescence per microgram protein absorbed.

*Flow cytometry assay*

The fresh excised tumor tissues were placed on ice and cut into 1 × 1 × 1 mm3 pieces. The obtained samples were then incubated in a mixture of 1 mg/mL collagenase type I plus 10 µg/mL DNase I diluted in RPMI 1640 solution at 37 °C for 1 h. To obtain singlet suspensions, the samples were ground, passed through a 75-µm filter, and centrifuged at 500 × g and 4 °C for 5 min. The sediment was lysed using an ammonium–chloride–potassium lysis buffer for 5 min, and the sediment was washed with PBS, followed by the addition of RPMI 1640 containing 10% FBS. Finally, the cell concentration was adjusted to 1 × 106/mL. The cell membranes and cytoplasm were stained with antibodies, fixed with RPMI 1640 containing 1% (v/v) FBS, and analyzed using the CytoFLEX flow cytometer. Data were processed using FlowJo software (San Carlos, CA, USA).

*Immunohistochemical assay and immunofluorescence staining*

Immunohistochemical assays were performed in the tumor and lung tissues to measure the expression levels of CD11, MMP9, and TGF-1β according to our previous method (Chem Eng J. 2022; 427: 131742). For the immunofluorescence staining of the myeloid-derived suppressor cells (MDSCs) in the tumor tissues, the samples were treated with Alexa Fluor® 488 anti-CD11b (1:400) overnight at 4 °C, stained with Cy3-labeled goat-anti-rabbit IgG secondary antibodies (1:200), sealed onto coverslips using an anti-fade fluorescent mounting media, and visualized using a fluorescence microscope (BX53; Olympus, Tokyo, Japan).

2. Supplementary Table S1. Peak positions and tentative assignments in the spectrum of surface-enhanced Raman spectroscopy. [P: *Platycodon grandiflorum*; C: *Curcuma zedoaria*; HG: herb pair of *Platycodon grandiflorum* and *Curcuma zedoaria*. Relative intensities: s: strong; m: medium; w: weak; sh: shoulder .

| Peak position (cm-1) | Tentative assignment | P |  | C |  | HG | HNS | |  | LPN | Ref |
| --- | --- | --- | --- | --- | --- | --- | --- | --- | --- | --- | --- |
| 556 | ν. C-C |  |  |  |  |  |  |  |  | w | S[1] |
| 620/622 | ρ. CH2 | m |  |  |  |  |  | w |  |  | S[2] |
| 677 | τ. C=O |  |  | w |  | m |  | w |  |  | S[3] |
| 730/732 | δ. C-C-O, ν. C-H (Ph) , ω. NO2, δ. C=O | s |  | w |  | m |  | m |  |  | S[4-6] |
| 826/828 | ν. C-C, δ. C-N, δ. Ph | m |  | w |  | s |  | m |  |  | S[7] |
| 926 | ν. C-COO-, ν. COC- |  |  | sh |  | sh |  | sh |  |  | S[8] |
| 940 | ν. C-O-C, ν. C-COO- |  |  | sh |  |  |  |  |  | m | S[9, 10] |
| 957 | δ. C-H, ν. C-C, | m |  |  |  |  |  |  |  |  | S[11, 12] |
| 1001/1002 | ν. Ph | sh |  | w |  | sh |  | sh |  |  | S[7] |
| 1028/1031 | δ. CH, ν. C=C (Ph) | sh |  | w |  |  |  | sh |  |  | S[7][5] |
| 1077 | δ. C-C, |  |  |  |  |  |  |  |  | s | S[13] |
| 1130/1131 | ν. C-O, δ. C-C, δ. C-O, δ. C-O-H | sh |  | w |  | m |  | w |  |  | S[8, 10] |
| 1142/1147 | δ. C-C, ν. N-C, νas. C-C(=O)-C |  |  |  |  |  |  |  |  | m | S[14, 15] |
| 1170 | ρ. CH3, δ. C-H |  |  |  |  |  |  | sh |  | s | S[5, 6] |
| 1188/1190 | β. C-H, ν. C-C, ν. C-N | w |  | sh |  | sh |  | w |  |  | S[16, 17] |
| 1216/1217 | δ. CH/CH2, β. C-H, ν. C-O-C, | sh |  |  |  | m |  | sh |  |  | S[10, 18, 19] |
| 1244/1250 | ν. C-N, ν. CO | sh |  |  |  | sh |  |  |  |  | S[8, 20] |
| 1271/1272 | ω. CH2, β. C-H, ν. C-O-C, ν. C-O (Ph), νas. C-N |  |  | m |  |  |  | sh |  | s | S[5, 6, 21, 22] |
| 1322/1324 | δ. C-O-H, δ. O-H (Ph), δ (CH2) | s |  | w |  |  |  | m |  |  | S[4, 6, 21] |
| 1334 | β. CH |  |  |  |  | s |  |  |  |  | S[12] |
| 1376/1377 | δ. CH2, ν. C-O, δ. CH3,ν. COO- | m |  | sh |  | sh |  | m |  |  | S[14, 19, 23] |
| 1402 | δ. pyrazole ring, ν. C-C, δ. C=C=C | m |  |  |  |  |  | m |  |  | S[24] |
| 1431/1432/1433 | νs. CO- | sh |  | s |  | s |  | m |  | sh | S[25] |
| 1452 | ν. O=C-N |  |  | sh |  |  |  |  |  | s | S[26] |
| 1460/1463 | δ. N-H, δ. C-H | m |  |  |  | sh |  |  |  |  | S[27] |
| 1494/1495 | δ. HCC, δ. CH3, νs. COO, ν. C2-N3 +β. C2H | sh |  | sh |  |  |  | m |  |  | S[2,14,28,29] |
| 1500 | δS. CH2 |  |  |  |  |  |  |  |  | s | S[30] |
| 1588/1590 | νar. CC, νas. COO-, ν. CC ring | s |  | s |  | s |  | s |  | w | S[9, 10, 31] |
| 1636/1637 | ν. C-C, ν. C=O |  |  | w |  |  |  |  |  |  | S[4, 6] |

ν: stretching; π: wagging; ρ: rocking; δ: bending, deformation; as: asymmetric; s: symmetric; β: in-plane deformation; γ: out-of-plane deformation; Ph: phenyl ring; ar: aromatic ring

References in Supplementary Table S1

[1] Sun J.H., Feng Y., Wang S., Sheng Y., An L.P., Du P.G., et al. Identification of Cordyceps sinensis and Cordyceps militaris by surface enhanced Raman spectroscopy with chemometric analysis. *Chin J Pharm*. 2022; 42(4):727-733.

[2] Daoudi K., Ramachandran K., Alawadhi H, Boukherroub R., Dogheche E., Gaidi M., et al. Ultra-sensitive and fast optical detection of the spike protein of the SARS-CoV-2 using AgNPs/SiNWs nanohybrid based sensors. *Surf Interfaces*. 2021; 27:101454.

[3] Pan X., Li L., Lin H., Tan J.Y., Wang H.T., Liao M.L., et al. A graphene oxide-gold nanostar hybrid based-paper bio sensor for label-free SERS detection of serum bilirubin for diagnosis of jaundice. *Biosens Bioelectron*. 2019; 145:111713.

[4] Xiao M., Chen Y., Zheng F., Qi A., Xiao M.J., Wang H.Q., et al. Predicting the storage time of green tea by myricetin based on surface-enhanced Raman spectroscopy. *NPJ Sci Food*. 2023; 7(1):28.

[5] Panicker C.Y., Varghese H.T., Philip D, Nogueira H.I., Castkova K. Raman, IR and SERS spectra of methyl(2-methyl-4,6-dinitrophenylsulfanyl) ethanoate. *Spectroc. Acta Pt. A-Molec. Biomolec. Spectr.* 2007; 67(5):1313-1320.

[6] Ma Z..W, Tang J.W., Liu Q.H., Mou Q.Y., Qiao R., Du Y., et al. Identification of geographic origins of Morus alba Linn. through surfaced enhanced Raman spectrometry and machine learning algorithms. *J Biomol Struct Dyn*. 2023; 1-14.

[7] Li S.Z., Han S.Q.G.W., Zhang C., Zhao H., Hasi W.L.J. Research on the detection of ephedrine hydrochloride using surface enhanced Raman spectroscopy. *Chin J Pharm Anal*. 2019; 39(6):1031-1035.

[8] Naman A., Tahseen H., Nawaz H., Majeed M.I., Ali A., Haque A., et al. Surface-enhanced Raman spectroscopy for characterization of supernatant samples of biofilm forming bacterial strains. *Spectroc. Acta Pt. A-Molec. Biomolec. Spectr.* 2023; 305:123414.

[9] Izquierdo-Lorenzo I., García-Ramos J.V., Sanchez-Cortes S. Vibrational characterization and surface-enhanced Raman scattering detection of probenecid doping drug. *J. Raman Spectrosc*. 2013; 44(10): 1422-1427.

[10] Dua M., Sun Z.Q., Xie M.Z., Gu S.Q., Chen Y.C., Wang Q. A new method for rapid identification of traditional Chinese medicine based on new silver sol: Using SERS spectrum for quality control of flavonoids and flavonoid glycosides in Potentilla Discolor Bge. *J. Mater. Chem. C*. 2023; (): 1-24.

[11] Jurasekova Z., Domingo C., Garcia-Ramosa J.V., Sanchez-Cortes S. Adsorption and catalysis of flavonoid quercetin on different plasmonic metal nanoparticles monitored by SERS. *J. Raman Spectrosc*. 2012; 43 (12) : 1913-1919.

[12] Umadevi M., Ramasubbu A., Vanelle P., Ramakrishnan V. Spectral investigations on 2-methyl-1,4-naphthoquinone: solvent effects, host–guest interactions and SERS. *J. Raman Spectrosc.* 2003; 34: 112–120.

[13] Hu Q, Sellers C, Kwon JS, Wu HJ. Integration of surface-enhanced Raman spectroscopy (SERS) and machine learning tools for coffee beverage classification.*Digit Chem Eng*. 2022;3:100020.

[14] Philip D., John A., Panicker C.Y., Varghese H.T. FT-Raman, FT-IR and surface enhanced Raman scattering spectra of sodium salicylate. *Spectroc. Acta Pt. A-Molec. Biomolec. Spectr.* 2001; 57(8):1561-1566.

[15] Zhao J., Liu Y., Fales A.M., Register J., Yuan H., Vo-Dinh T. Direct analysis of traditional Chinese medicines using Surface-Enhanced Raman Scattering (SERS). *Drug Test Anal*. 2014; 6(10):1063-1068.

[16] Ma H., Liu S., Zhu L., Han X.X., He C.Y., Zhao B. Vibrational spectroscopy and DFT analysis of 4-cyanophenylhydrazine: A potential SERS probe. *Spectroc. Acta Pt. A-Molec. Biomolec. Spectr.* 2021; 253:119574.

[17] Chamuaha N., Bhuyana N., Dasb P.P., Ojahc N., Choudharyc A.J., Medhib T., et al. Gold-coated electrospun PVA nanofibers as SERS substrate for detection of pesticides. *Sensors & Actuators: B. Chemical*. 2018; 273:710–717.

[18] Birech Z., Ondieki A.M., Opati R.I.I., Mwangi P.W. Low cost Raman sample substrates from conductive silver paint smear for Raman spectroscopic screening of metabolic diseases in whole blood. *Vib. Spectrosc.* 2020;108: 103063.

[19] Xiao G.N., Li Y.X., Shi W.Z., Shen L., Chen Q., Huang L. Highly sensitive, reproducible and stable SERS substrate based on reduced graphene oxide/silver nanoparticles coated weighing paper. *Appl. Surf. Sci.*. 2017; 404: 334–341.

[20] Huang H., Shi H., Feng S.Y., Lin J.Q., Chen W.W., et al. Quick detection of traditional Chinese medicine ‘Atractylodis Macrocephalae Rhizoma’ pieces by surface-enhanced Raman spectroscopy . *Laser Phys*. 2013; 23: 015601 (4pp).

[21] Liu C.C., Chen Z., Luo W.J., Liang W.Y. Rapid determination of five acid pigments in crocus sativus by surface-enhanced Raman spectroscopy. *Chemical Analysis And Meterage*. 2023; 32(6): 17-22.

[22] Qian H., Lin M., Zhou P. Measurement of Forchlorfenuron in Grapes by Surface - Enhanced Raman Spectroscopy coupled with Gold Nano substrates. *Int J Food Sci Nutr Diet.* 2016; 5(1),: 258-264.

[23] Ni F., Feng H., Gorton L., Cotton T.M. Electrochemical and SERS Studies of Chemically Modified Electrodes: Nile Blue A, a Mediator for NADH Oxidation. *Langmuir*. 1990; 6: 66-73.

[24] Ding Y.R., Cheng Y.Q., Hao B.Q., Zhu L., Zhang N., Zhao B., et al. Metal–organic framework modifed by silver nanoparticles for SERS‑based determination of sildenafl and pioglitazone hydrochloride. *Microchimica Acta*. 2021; 188: 351.

[25] Cennamo G., Montorio D., Morra V.B., Criscuolo C., Lanzillo R., Salvatore E., et al. Surface-enhanced Raman spectroscopy of tears: toward a diagnostic tool for neurodegenerative disease identification. *J. Biomed. Opt.* 2020; 25(8): 087002-1-12.

[26] Wu J.J., Xi J.F., Chen H.B., Li S.J., Zhang L., Li P., et al. Flexible 2D nanocellulose-based SERS substrate for pesticide residue detection. *Carbohydr Polym.* 2022; 277:118890.

[27] Furini L.N., Sanchez-Cortes S., López-Tocón I., Otero J.C., Ricardo F., Arocad et al. Detection and quantitative analysis of carbendazim herbicide on Ag nanoparticles via surface-enhanced Raman scattering. *J. Raman Spectrosc*. 2015; 46: 1095–1101.

[28] Wong Y.L., Kang W.C.M., Reyes M., Teo J.W.P., Kah J.C.Y. Rapid Detection of Carbapenemase-Producing EnterobacteriacaeBased on Surface-Enhanced Raman Spectroscopy with Gold Nanostars. *ACS Infect. Dis*. 2020; 6: 947−953.

[29] Matulaitiene˙ I., Kuodis Z., Eicher-Lorka O., Niaura G. SERS characterization of imidazole ring terminated self-assembled monolayer formed from lipoic acid histamide on silver electrode. *J. Electroanal. Chem*. 2013; 700: 77–85.

[30] Leventi G., Paulo C., Da S., Jaqueline R.; De A., Ricardo B., Morais, Paulo C., Da S., Sebastião W. Fabrication and characterization of glycine-loaded PEG nanoparticles for drug delivering: A comprehensive SERS study. *Appl Surf Sci*. 2018; 450: 396–403.

[31] Wang L.Y., Ma P., Chen H., Chang M., Lu P., Chen N., et al. Rapid Determination of Mixed Pesticide Residues on Apple Surfaces by Surface-Enhanced Raman Spectroscopy. *Foods*. 2022; 11: 1089.

Supplementary Table S2. Identification of chemical constituents of *Platycodonis Radix* and *Curcumae Rhizoma* herb group in negative ion

| RT (min) | Formula | Error (ppm) | Calc.MW | m/z | mzCloud Best Match | Reference Ion | MS2 fragment ions（m/z） | Identification | Compound class | Herb | Ref. |
| --- | --- | --- | --- | --- | --- | --- | --- | --- | --- | --- | --- |
| 0.92 | C6H14O6 | -1.18 | 182.0788 | 181.0716 | 99.9 | [M-H]– | 168.4012, 163.0615, 101.0247, 89.0247 | Mannitol | Alcohols | P, C | [a] |
| 0.97 | C6H10O5 | -1.45 | 162.0526 | 161.0455 | 95.6 | [M-H]– | 131.0352, 89.0247, 73.0298, 59.0140 | 3-Hydroxy-3-methylglutaric acid | Organic acids | C | [a] |
| 1 | C6H8O7 | -1.17 | 192.0268 | 191.0195 | 97.1 | [M-H]– | 173.0093, 129.0196, 111.0090, 87.0090 | Citric acid | Organic acids | P, C | [a] |
| 1.03 | C5H7NO3 | 1.16 | 129.0427 | 128.0355 | 100 | [M-H]– | 110.5045, 96.3367, 82.0299, 75.1015 | 4-Oxoproline | Amino acid derivatives | C | [a] |
| 1.32 | C4H6O5 | -0.73 | 134.0214 | 133.0141 | 99.6 | [M-H] – | 115.0039, 71.0141, 89.0247, 59.0142 | L-(-)-Malic acid | Organic acids | C | [a] |
| 1.44 | C18H32O16 | -4.41 | 504.1668 | 503.1596 | 85.7 | [M-H] – | 323.0980, 179.0562, 119.0353, 89.0247 | Manninotriose | Saccharides | C | [a] |
| 1.52 | C4H4O4 | 0.36 | 116.011 | 115.0037 | 97.9 | [M-H] – | 85.6665, 76.5927, 71.0141, 50.9347 | Maleic acid | Organic acids | C | [a] |
| 1.68 | C6H6O6 | -1.61 | 174.0162 | 173.0089 | 97.1 | [M-H] – | 141.6590, 129.0195, 111.0090, 85.0297 | trans-Aconitic acid | Organic acids | C | [a] |
| 1.7 | C6H10O6 | -1.86 | 178.0474 | 177.0401 | 89.3 | [M-H] – | 159.0299, 115.0403, 87.0091, 59.0139 | δ-Gluconic acid δ-lactone | Lactones | C | [a] |
| 1.95 | C4H6O4 | -0.24 | 118.0266 | 117.0193 | 99.5 | [M-H] – | 99.0091, 73.0298, 85.5082, 58.8847 | Succinic acid | Organic acids | C | [a] |
| 2.23 | C6H13NO2 | 0 | 131.0946 | 130.0874 | 99.1 | [M-H] – | 61.9886 | DL-β-Leucine | Organic acids | C | - |
| 2.98 | C10H13N5O5 | -3.38 | 283.0907 | 282.0834 | 99.8 | [M-H] – | 178.0977, 150.0423, 133.0150, 94.0299 | Isoguanosine | Alkaloids | C | - |
| 5.05 | C7H6O4 | -0.44 | 154.0265 | 153.0193 | 99.7 | [M-H] – | 109.0296 | Protocatechuic acid | Organic acids | P | [b] |
| 5.09 | C19H20N4O2 | 2.14 | 336.1594 | 335.1521 | 99 | [M-H] – | 264.9928, 218.2575, 130.6329, 174.1147 | 6-Benzyl-2-(tert-butyl)-6,7-dihydro-4H-pyrazolo[1,5-a]pyrrolo[3,4-d]pyrimidine-5,8-dione | Alkaloids | - | - |
| 5.22 | C5H10O3 | 0.39 | 118.063 | 117.0558 | 99.5 | [M-H] – | 98.4900, 71.0505, 63.3287, 55.7028 | 2-Hydroxy-2-methylbutyric acid | Organic acids | C | [a] |
| 5.26 | C16H18O9 | -4.15 | 354.0936 | 353.0863 | 82.2 | [M-H] – | 191.0558, 179.0348, 173.0458, 161.0250 | Cryptochlorogenic acid | Phenolic acids | C | - |
| 5.62 | C18H18O4S | 3.86 | 330.0939 | 329.0866 | 92.2 | [M-H] – | 209.0456, 191.0350, 167.0350, 123.0453 | 4,4'-Sulfonylbis[2-(prop-2-en-1-yl)phenol] | Phenols | - | - |
| 5.7 | C11H12N2O2 | 0.36 | 204.0894 | 203.0821 | 98.3 | [M-H] – | 159.0929, 142.0664, 116.0508, 74.0250 | L-Tryptophan | Amino acids | P, C | [c] |
| 6.08 | C15H22O5 | -3.18 | 282.1458 | 281.1386 | 96.8 | [M-H] – | 237.1497, 219.1393, 213.0764, 169.0867 | NP-004987 | Organic acids | - | - |
| 6.15 | C7H6O3 | -0.77 | 138.0316 | 137.0243 | 99.8 | [M-H] – | 93.0349 | Salicylic acid | Phenolic acids | C | [a] |
| 6.62 | C7H12O6 | -2.65 | 192.0629 | 191.0556 | 99.3 | [M-H] – | 146.9386, 102.9491, 97.1576, 85.0299 | D-(-)-Quinic acid | Organic acids | C | [c] |
| 6.63 | C16H18O9 | -4.22 | 354.0936 | 353.0863 | 99.3 | [M-H] – | 179.0349, 191.0560, 173.0455, 135.0453 | Chlorogenic acid | Phenolic acids | P, C | [d] |
| 6.79 | C8H8O4 | -1.05 | 168.0421 | 167.0348 | 100 | [M-H] – | 152.0116, 123.0453, 83.0145, 65.4925 | Orsellinic acid | Phenolic acids | C | - |
| 7.42 | C7H6O2 | 0.19 | 122.0368 | 121.0295 | 99.6 | [M-H] – | 109.0252, 92.0268, 83.4343, 55.8984 | 4-Hydroxybenzaldehyde | Aldehydes | C | [a] |
| 8.27 | C9H8O3 | -1.97 | 164.047 | 163.0398 | 99.5 | [M-H] – | 119.0505, 117.0347, 83.5976, 71.1150 | p-Coumaric acid | Phenolic acids | P | [a] |
| 8.56 | C8H8O | -0.56 | 120.0575 | 119.0502 | 99.8 | [M-H] – | 88.0938, 73.8257, 67.3689, 51.4616 | Phenylacetaldehyde | Aldehydes | C | [a] |
| 11.22 | C57H92O28 | -7.88 | 1224.5679 | 1223.5606 | - | [M-H] – | 681.3826, 469.1587 | Platycodin D | Saponins | P | [c] |
| 12.03 | C15H22O4 | -3.33 | 266.1509 | 265.1437 | 86.8 | [M-H] – | 221.1543, 203.1439, 163.1129, 83.0504 | NP-021701 | Organic acids | - | - |
| 12.29 | C19H20O3 | -3.18 | 296.1403 | 295.133 | 96.6 | [M-H] – | 251.1283, 227.1283, 188.0786, 87.0086 | 1,7-Bis(4-hydroxyphenyl)hept-1-en-3-one | Ketones | C | - |
| 13.82 | C19H24O3 | -3.31 | 300.1716 | 299.1643 | 97.3 | [M-H] – | 211.3139, 181.4951, 163.7262, 58.9420 | 2-Methoxyestrone | Steroids | C | - |
| 14.33 | C15H24O3 | -2.09 | 252.172 | 251.1648 | 99.1 | [M-H] – | 207.1754, 189.1655, 137.0975, 125.0976 | 2-(8-Hydroxy-4a,8-dimethyldecahydro-2-naphthalenyl)acrylic acid | Sesquiterpenoids | C | - |
| 15.04 | C15H22O3 | -3.25 | 250.1561 | 249.1488 | 96.5 | [M-H] – | 205.1596, 191.1076, 112.9858, 71.0504 | Nardosinone | Sesquiterpenoids | C | [a] |
| 15.99 | C14H22O2 | -2.98 | 222.1613 | 221.1541 | 92.5 | [M-H] – | 203.1439 , 177.1649, 152.0843, 71.0505 | 2,5-di-tert-Butylhydroquinone | Phenols | C | - |
| 17.46 | C20H32O3 | -3.89 | 320.2339 | 319.2266 | 91.4 | [M-H] – | 275.2374, 237.1855, 225.1856, 207.1751 | 11,12-Epoxy-(5Z,8Z,11Z)-icosatrienoic acid | Organic acids | - | - |
| 18.26 | C18H30O3 | -3.71 | 294.2184 | 293.2111 | 92.8 | [M-H] – | 275.2010, 235.1699, 171.1026, 121.1025 | 13(S)-HOTrE | Organic acids | - | - |
| 18.86 | C20H30O4 | -3.77 | 334.2132 | 333.2059 | 97.3 | [M-H] – | 289.2164, 271.2065, 265.1472, 233.1898 | 13,14-Dihydro-15-keto Prostaglandin A2 | Organic acids | - | - |
| 19.92 | C20H26O4 | -3.94 | 330.1818 | 329.1745 | 96.7 | [M-H] – | 285.1853, 257.1906, 241.1947, 146.9234 | Carnosol | Diterpenoids | C | - |
| 19.99 | C19H30O2 | -4.37 | 290.2233 | 289.216 | 81.7 | [M-H] – | 259.2056, 243.0997, 221.1180, 139.4449 | 5α-Dihydrotestosterone | Steroids | C | - |

P: Platycodonis Radix ; C: Curcumae Rhizoma

Supplementary Table S3. Identification of chemical constituents of Platycodonis Radix and Curcumae Rhizoma herb group in positive ion

| RT (min) | Formula | Error (ppm) | Calc.MW | m/z | mzCloud Best Match | Reference Ion | MS2 fragment ions （m/z） | Identification | Compound class | Herb | Ref |
| --- | --- | --- | --- | --- | --- | --- | --- | --- | --- | --- | --- |
| 0.87 | C6H14N4O2 | -1.62 | 174.1114 | 175.1187 | 95.8 | [M+H]+ | 158.0924, 130.0974, 116.0704, 70.0649 | DL-Arginine | Amino acids | P, C | [a] |
| 0.98 | C6H11NO2 | -3.64 | 129.0785 | 130.0858 | 90.7 | [M+H]+ | 84.0805, 70.0648, 60.0553 | Nipecotic acid | Organic acids | C | - |
| 1.44 | C5H11NO2 | -1.93 | 117.0788 | 118.086 | 88.4 | [M+H]+ | 92.0239, 72.0805, 70.7451, 55.0540 | 5-Aminovaleric acid | Organic acids | - | - |
| 1.45 | C5H5N5 | -1.27 | 135.0543 | 136.0616 | 99.7 | [M+H]+ | 119.0351, 108.0446, 94.0398, 51.9810 | Adenine | Nucleosides | C | [a] |
| 1.47 | C6H5NO2 | -2.59 | 123.0317 | 124.039 | 98.7 | [M+H]+ | 106.0288, 96.0442, 80.0492, 53.0386 | Nicotinic acid | Organic acids | C | - |
| 1.59 | C6H5NO3 | -1.06 | 139.0268 | 140.0341 | 96.5 | [M+H]+ | 122.0598, 112.0390, 94.0649, 84.0439 | 3-Hydroxypicolinic acid | Organic acids | C | - |
| 1.67 | C5H7NO3 | -2.7 | 129.0422 | 130.0495 | 99.1 | [M+H]+ | 102.0546, 84.0441, 70.0650, 56.0491 | D-(+)-Pyroglutamic acid | Amino acids | C | - |
| 1.99 | C9H11NO3 | -0.58 | 181.0738 | 182.0811 | 98.4 | [M+H]+ | 165.0545, 147.0439, 136.0755, 123.0439 | L-Tyrosine | Amino acids | C | - |
| 2.05 | C6H13NO2 | -1.68 | 131.0944 | 132.1017 | 99.8 | [M+H]+ | 86.0962, 69.0696 | L-Leucine | Amino acids | C | [e] |
| 2.14 | C5H5N5O | -0.4 | 151.0494 | 152.0566 | 97.7 | [M+H]+ | 134.0602, 128.0454, 124.0757, 110.0346 | Guanine | Nucleosides | P | [f] |
| 2.58 | C10H13N5O4 | -0.22 | 267.0967 | 268.104 | 100 | [M+H]+ | 136.0616 | Adenosine | Nucleosides | P, C | [g] |
| 4.04 | C9H11NO2 | -0.45 | 165.0789 | 166.0862 | 99.9 | [M+H]+ | 149.0598, 131.0490, 120.0805, 107.0490, 103.0540 | L-Phenylalanine | Amino acids | P, C | [e] |
| 4.68 | C16H17NO2 | -16.12 | 255.1218 | 256.1291 | 88.5 | [M+H]+ | 238.1185, 196.0965, 192.0654, 70.0649 | 4-ethoxy-N-[(4-methoxyphenyl)methylene]aniline | Anilines | - | - |
| 5.71 | C11H12N2O2 | -1.54 | 204.0896 | 205.0968 | 99.7 | [M+H]+ | 188.0705, 159.0916 | L-Tryptophan | Amino acids | C | [e] |
| 5.71 | C8H7N | -2.52 | 117.0576 | 118.0648 | 98.1 | [M+H]+ | 91.054 | Indole | N-containing heterocyclic compounds | C | [a] |
| 5.71 | C10H9N | -1.25 | 143.0733 | 144.0806 | 93.5 | [M+H]+ | 117.0697, 107.4536, 101.3076, 96.1168 | 6-Methylquinoline | N-containing heterocyclic compounds | C | [a] |
| 5.71 | C9H7NO | -1.45 | 145.0526 | 146.0598 | 98 | [M+H]+ | 132.7795, 118.0648, 111.1906, 91.0539 | 4-Indolecarbaldehyde | Aldehydes | C | [a] |
| 6.15 | C7H6O3 | -0.12 | 138.0317 | 139.0389 | 80.3 | [M+H]+ | 121.0288, 111.0439, 93.0333, 65.0384 | Protocatechualdehyde | Aldehydes | C | [a] |
| 6.63 | C16H18O9 | -0.37 | 354.095 | 355.1022 | 92 | [M+H]+ | 285.0100, 163.0388, 135.0440, 91.0572 | Neochlorogenic acid | Organic acids | C | [d] |
| 6.69 | C12H12N2O2 | -0.78 | 216.0897 | 217.097 | 97.5 | [M+H]+ | 171.0916, 156.0807, 144.0806, 74.0234 | 2,3,4,9-Tetrahydro-1H-β-carboline-3-carboxylic acid | Organic acids | C | - |
| 6.79 | C8H8O4 | -0.21 | 168.0422 | 169.0495 | 94 | [M+H]+ | 151.0388, 127.0387, 123.0439, 95.0490 | Orsellinic acid | Phenolic acids | C | - |
| 6.79 | C14H18O9 | 0.03 | 330.0951 | 353.0843 | 80.2 | [M+Na]+ | 335.1136, 191.0314, 185.0422 | NP-014517 | Glycosides | - | - |
| 7.03 | C15H18O4 | 0.43 | 262.1206 | 263.1279 | 83.1 | [M+H]+ | 245.1169, 203.1065, 171.1167, 157.1011 | Psilostachyin B | Sesquiterpenoids | - | - |
| 7.43 | C7H6O2 | -1.78 | 122.0366 | 123.0438 | 96.7 | [M+H]+ | 105.0446, 95.0489, 81.0696, 77.0384 | 4-Hydroxybenzaldehyde | Aldehydes | C | [a] |
| 7.52 | C10H8O4 | -0.75 | 192.0421 | 193.0494 | 92.7 | [M+H]+ | 133.0648 | 7,8-Dihydroxy-4-methylcoumarin | Coumarins | - | - |
| 7.77 | C15H22N2O3 | -0.99 | 278.1628 | 279.17 | 95.5 | [M+H]+ | 149.0232, 120.0807, 86.0962, 69.0696 | Tolycaine | Amides | - | - |
| 8.23 | C8H8O3 | -1.27 | 152.0472 | 153.0544 | 86.1 | [M+H]+ | 125.0595, 111.0437, 93.0332, 65.0383 | Vanillin | Aldehydes | C | - |
| 8.58 | C12H14O2 | -1.13 | 190.0992 | 191.1065 | 90.8 | [M+H]+ | 173.0961, 145.1012, 105.0697 | Ligustilide | Lactones | C | [a] |
| 8.78 | C15H10O6 | -0.82 | 286.0475 | 287.0548 | 99.7 | [M+H]+ | 269.0439, 153.0181, 135.0433 | Luteolin | Flavonoids | P | [h] |
| 8.8 | C10H10O4 | -0.85 | 194.0577 | 195.065 | 82.7 | [M+H]+ | 177.0549, 149.0600, 145.0285, 117.0334 | Isoferulic acid | Phenolic acids | P | [a] |
| 9.09 | C15H20O5 | -2.28 | 280.1304 | 303.1197 | 91.7 | [M+Na]+ | 285.1098, 259.1304, 241.1197, 163.0365 | 4,6-dihydroxy-5a-methyl-3-methylidene-2-oxo-dodecahydronaphtho[1,2-b]furan-9-carbaldehyde | Aldehydes | - | - |
| 9.25 | C15H24O4 | -1.66 | 268.167 | 291.1562 | 98.5 | [M+Na]+ | 273.1467, 261.1467, 248.0832, 123.0416 | Acoric acid | Sesquiterpenoids | - | - |
| 9.6 | C15H22O3 | -1.84 | 250.1564 | 251.1637 | 86.9 | [M+H]+ | 203.1429, 145.1011, 133.1011, 131.0854 | Nardosinone | Sesquiterpenoids | C | [a] |
| 9.76 | C15H24O5 | -2.3 | 284.1617 | 307.1509 | 83.6 | [M+Na]+ | 289.1411, 271.1313, 223.1306, 219.1008 | NP-016437 | Organic acids | - | - |
| 10.45 | C15H16O3 | -2.26 | 244.1094 | 245.1167 | 88.2 | [M+H]+ | 227.1064, 199.1116, 187.0751, 159.0803 | Linderalactone | Sesquiterpenoids | C | [a] |
| 11.03 | C9H10O3 | -3.79 | 166.0624 | 167.0696 | 93.4 | [M+H]+ | 152.0466, 123.0438, 106.0412, 78.0461 | o-Veratraldehyde | Aldehydes | C | [a] |
| 11.29 | C15H24O3 | -3.9 | 252.1716 | 275.1608 | 99.9 | [M+Na]+ | 257.1500, 169.9370, 89.0869, 79.7060 | ilicic acid | Sesquiterpenoids | C | - |
| 11.31 | C19H22O5 | -3.42 | 330.1456 | 313.1423 | 97.4 | [M+H-H2O]+ | 123.0438 | Muricarpone B | Phenols | C | - |
| 11.9 | C15H22O | -2.42 | 218.1665 | 219.1738 | 82.4 | [M+H]+ | 201.1639, 135.1168, 147.1169, 107.0854 | α-Cyperone | Sesquiterpenoids | C | - |
| 11.99 | C15H24O | -1.85 | 220.1823 | 221.1896 | 85.1 | [M+H]+ | 203.1794, 147.1168, 109.1010, 95.0854, | (-)-Caryophyllene oxide | Sesquiterpenoids | C | [a] |
| 12.29 | C10H8O | -3.92 | 144.057 | 145.0643 | 96.1 | [M+H]+ | 127.0542, 117.0697, 115.0541, 91.0541 | 1-Naphthol | Phenols | C | - |
| 12.44 | C15H18O2 | -1.13 | 230.1304 | 231.1377 | 86.1 | [M+H]+ | 213.1275, 187.1117, 185.1325, 143.0856 | Atractylenolide I | Sesquiterpenoids | C | [a] |
| 12.48 | C15H20O3 | -2.06 | 248.1407 | 249.148 | 94.9 | [M+H]+ | 231.1380, 213.1274, 185.1325, 145.1012 | Parthenolide | Sesquiterpenoids | C | [a] |
| 13 | C15H20O2 | -3.34 | 232.1456 | 233.1528 | 94 | [M+H]+ | 215.1429, 187.1480 | Atractylenolide II | Sesquiterpenoids | P, C | [c] |
| 13.25 | C15H20O4 | -1.63 | 264.1357 | 265.143 | 95 | [M+H]+ | 229.1223, 121.1011, 107.0855 | Abscisic acid | Sesquiterpenoids | C | [a] |
| 13.32 | C19H22O3 | -3.43 | 298.1559 | 299.1632 | 98.4 | [M+H]+ | 107.0489 | Auraptene | Coumarins | - | - |
| 13.44 | C15H22O3 | -1.07 | 250.1566 | 273.1459 | 94.5 | [M+Na]+ | 255.1355, 227.1071, 213.1266, 187.0723 | NP-002089 | Organic acids | - | - |
| 14.72 | C15H22O2 | -1.45 | 234.1616 | 235.1689 | 90.7 | [M+H]+ | 175.1481, 133.1012, 123.0804, 95.0854 | Curcumenol | Sesquiterpenoids | C | [a] |
| 14.86 | C15H22O3 | -1.38 | 250.1566 | 273.1458 | 93.7 | [M+Na]+ | 213.1269, 201.1237, 157.1006, 145.1002 | Hydroxyvalerenic acid | Sesquiterpenoids | - | - |
| 15.95 | C15H20O3 | -1.35 | 248.1409 | 231.1377 | 82.1 | [M+H-H2O]+ | 213.1273, 185.1324, 175.0753, 161.0597 | Atractylenolide III | Sesquiterpenoids | P, C | [c] |
| 16.47 | C15H18O3 | -4.16 | 246.1246 | 247.1318 | 98.3 | [M+H]+ | 229.1223, 201.1275, 161.0597, 139.0389 | Arglabin | Sesquiterpenoids | C | [a] |
| 19.4 | C18H30O2 | 0.18 | 278.2246 | 279.2319 | 98.8 | [M+H]+ | 109.1010, 95.0853, 81.0696, 67.0540 | α-Linolenic acid | Organic acids | P, C | [a] |
| 20.6 | C15H22O | -1.49 | 218.1667 | 219.174 | 92.3 | [M+H]+ | 201.1635, 163.1116, 137.0960 | Germacrone | Sesquiterpenoids | C | [a] |
| 28.05 | C22H43NO | -3.09 | 337.3334 | 338.3407 | 96 | [M+H]+ | 83.0854 | Erucamide | Amides | - | - |

P*: Platycodonis Radix* ; C: *Curcumae Rhizoma*

References in Supplementary Table S2 and Supplementary Table S3

[a] Hu S, Ge M, Zhang S, Jiang M, Hu K, Gao L. Front Oncol. 12(2022)854596.

[b] Wang L. Study on the Material Basis and Prediction of the Mechanism of Fufang Xianzhuli Ye in Stopping Coughs and Eliminating Phlegm [D]. Nanchang University, 2023.

[c] Wang C. Studies on Chemical Constituents and Antidepressant Effect of Different Parts from Platycodon grandiflorum [D]. Jilin University, 2018.

[d] Zhao H. Study on Therapeutic Material Basis of the Qingjin Huatan Tang’s substance benchmarks [D]. Tianjin University of Traditional Chinese Medicine, 2023.

[e] Wu H. Study on the Mechanism of Platycodon grandiflorus Decoction in the Treatment of Acute Lung Injury Based on UPLC-Q-TOF-MS/MS and Network Pharmacology [D]. Anhui University of Chinese Medicine, 2023.

[f] Chen B. Study on the Chemical Constituents of Platycodon grandiflorum and Gentianae radix [D]. Jilin Agricultural University, 2019.

[g] Deng Y, Ren H, Ye X, Xia L, Liu M, Liu Y, et al., Front Pharmacol. 11(2020)564131.

[h] Deng Y, Ye X, Chen Y, Ren H, Xia L, Liu Y, et al. Front Pharmacol. 11( 2021)609825.

**Figure S1- Figure S8 and Cleavage information of the chemical compounds**

**Cleavage information of the chemical compounds**

(1) Flavonoids

Flavonoids are mainly through RDA (Retro Diels-Alder) cleavage or detach neutral H2O molecule[]，the excimer ion of luteolin is m/z 287.0548 [M+H]+ in the positive ion mode, the fragment ion m/z 269.0439 [M+H]+ was obtained by removing one molecule of H2O; In addition, the fragment ions m/z 135.0433 [M+H]+ and m/z 153.0181 [M+H]+ were generated through RDA cleavage. The fragmentation pathway of the luteolin is shown in Figure S1.

**Fig. S1**. The MS/MS fragmentation pathway in the positive ion mode of luteolin.

(2) Phenolic acids

The excimer ion m/z 353.0863 [M-H]- of chlorogenic acid in the negative ion mode, cleavage produced fragment ions m/z 191.0560 [M-H]- and m/z 179.0349 [M-H]-. The loss of small molecules such as CO2 is a typical cracking law of phenolic acids, the fragment ion m/z 173.0455 [M-H]- was obtained by removing one molecule of H2O from m/z 191.0560 [M-H]-; the fragment ion m/z 135.0453 [M-H]- was obtained by removing one molecule of CO2 from m/z 179.0349 [M-H]-. The fragmentation pathway of the chlorogenic acid is shown in Fig. S2.

**Fig. S2**. The MS/MS fragmentation pathway in the negative ion mode of chlorogenic acid.

(3) Sesquiterpenoids

The excimer ion m/z 219.1740 [M+H]+ of germacrone in the positive ion mode, which generate fragment ion m/z 201.1635 [M+H]+ by a neutral molecule of H2O was removed. In addition, loss of C4H8 or C6H10 generate fragment ions m/z 163.1116 [M+H]+ or m/z 137.0960 [M+H]+. The fragmentation pathway of the germacrone is shown in Fig. S3.

**Fig. S3**. The MS/MS fragmentation pathway in the positive ion mode of germacrone.

(4) Amino acids

The removal of NH3 and COOH by excimer ions in positive ion mode is a typical mass spectrometry fragmentation law of amino acids. The excimer ion m/z 166.0862 [M+H]+ of L-phenylalanine in the positive ion mode. The fragment ions m/z 149.0598 [M+H]+ and m/z 131.0490 [M+H]+ was obtained by continuously removing NH3 and H2O; Also, the fragment ions m/z 120.0805 [M+H]+ and m/z 103.0540 [M+H]+ are generated by continuously removing HCOOH and NH3; In addition, the fragment ion m/z 107.0490 [M+H]+ was obtained by removing CHO2N. The fragmentation pathway of the L-phenylalanine is shown in Fig. S4.

**Fig. S4.** The MS/MS fragmentation pathway in the positive ion mode of L-phenylalanine.

(5) Nucleosides

The excimer ion m/z 268.1040 [M+H]+ of adenosine in the positive ion mode, the fragment ion m/z 136.0616 [M+H]+ was obtained by removing one molecule of deoxyribose. The fragmentation pathway of the adenosine is shown in Fig. S5.

**Fig. S5**. The MS/MS fragmentation pathway in the positive ion mode of adenosine.

(6) Saponins

The excimer ion m/z 1223.5606 [M-H]- of platycodon D in the negative ion mode produces fragment ions m/z 681.3826 [M-H]- and m/z 469.1587 [M-H]-. The fragmentation pathway of the platycodon D is shown in Fig. S6.

**Fig. S6.** The MS/MS fragmentation pathway in the negative ion mode of platycodon D.

(7) Glycosides

Glycosides mainly undergo glycosidic bond cleavage. The excimer ion m/z 353.0843 [M+Na]+ of NP-014517 in the positive ion mode, which generates fragment ions m/z 191.0314 [M+Na]+ and m/z 185.0422 [M+Na]+ through glycosidic bond cleavage; In addition, the fragment ion m/z 335.1136 [M+Na]+ was obtained by removing one molecule of H2O. The fragmentation pathway of the NP-014517 is shown in Fig. S7.

**Fig. S7.** The MS/MS fragmentation pathway in the positive ion mode of NP-014517.

**Fig. S8**


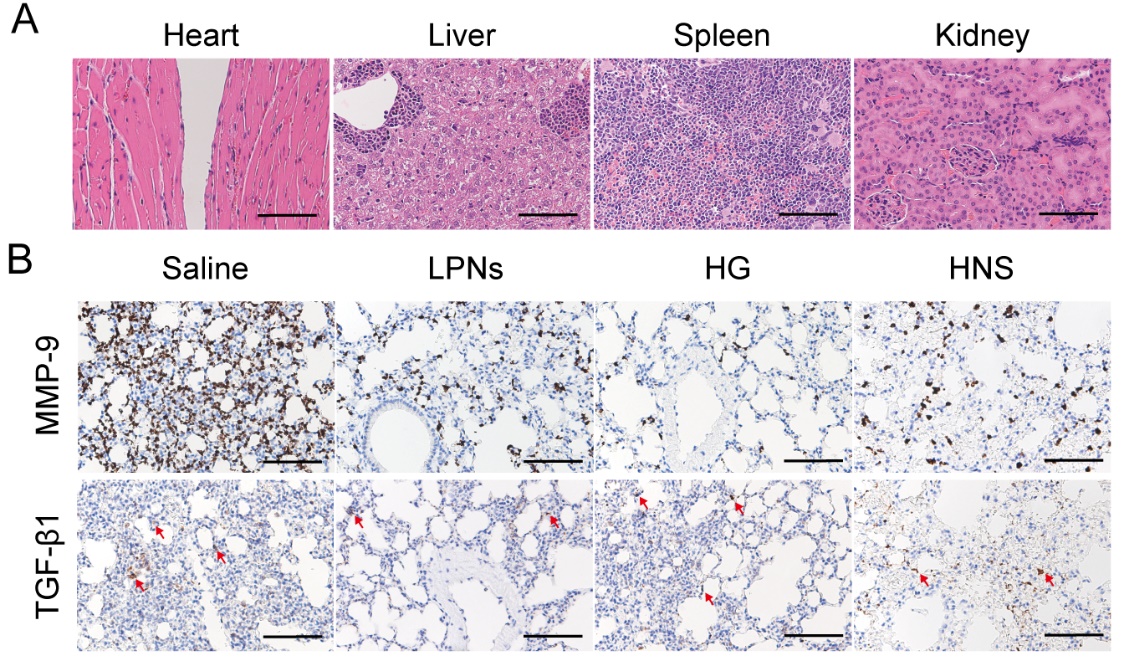


**Fig. S8**. Histopathological analyses of tissues from control mice and immunomodulatory effects of the HNS in the lung tissue. (A)H&E staining of the heart, liver, spleen, and kidney tissue from control mice. (B) Immunohistochemical staining for MMP-9 and TGF-β1 in the lung tissue from mice in the control, LPNs, HG, and HNS. Scale bar, 100 μm.
